# Supplementary material for: Boosting the peroxidase-like activity of Pt nanozymes by a synergistic effect of Ti3C2 nanosheets for dual mechanism detection
Source: Royal Society of Chemistry journal article supplement (doi:10.1039/d2dt01696f), 2022-01-01
Supplement: d2dt01696f1.pdf [file d2dt01696f1.pdf]

Supporting information for

**Boosting the Peroxidase-like Activity of Pt Nanozyme by  
Synergistical Effect of Ti<sub>3</sub>C<sub>2</sub> Nanosheets for Dual Mechanism  
Detection**

*Hongqi Geng<sup>a,b</sup>, Zhijuan Li<sup>a</sup>, Quan Liu<sup>a</sup>, Qi Yang<sup>a</sup>, Huimin Jia<sup>a\*</sup>, Qiang Chen<sup>c</sup>, Aiguo Zhou<sup>b</sup>, Weiwei He<sup>a\*</sup>*

<sup>a</sup>Key Laboratory for Micro-Nano Materials for Energy Storage and Conversion of Henan Province, College of Chemical and Materials Engineering, Institute of Surface Micro and Nano Materials, Xuchang University, Xuchang, Henan 461000, P. R. China.

<sup>b</sup>School of Materials Science and Engineering, Henan Polytechnic University, Jiaozuo, Henan 454000, P. R. China.

<sup>c</sup>Wenzhou Institute, University of Chinese Academy of Sciences, Wenzhou, Zhejiang, China, 352001.

**\*Corresponding Authors**

E-mail: heweiweixcu@gmail.com (W. H.); jhmxcu2015@163.com (H. J.)

**Notes**

The authors declare no competing financial interest.

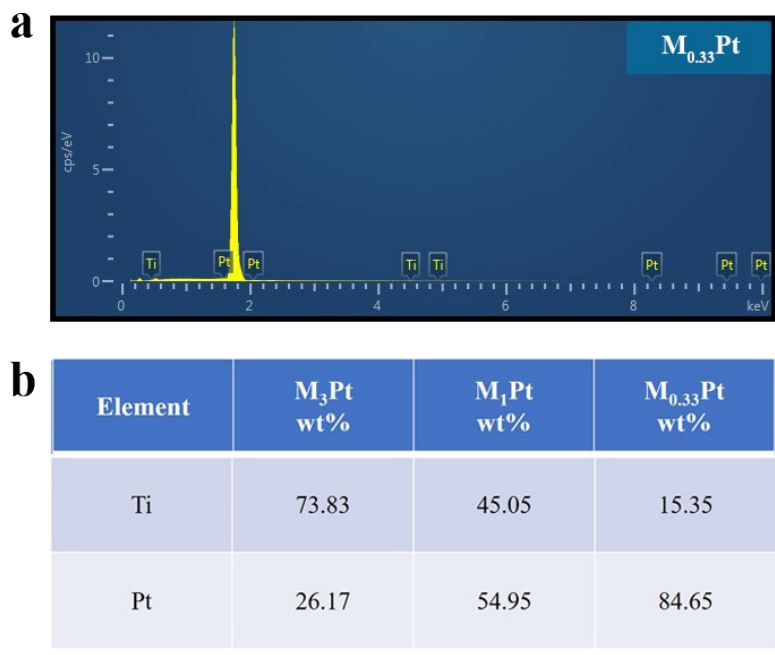

Fig. S1: (a) EDS spectrum of M<sub>0.33</sub>Pt hybrid nanosheets, (b) The calculated mass ratio of element Ti and Pt in MXene/Pt by EDS analysis.

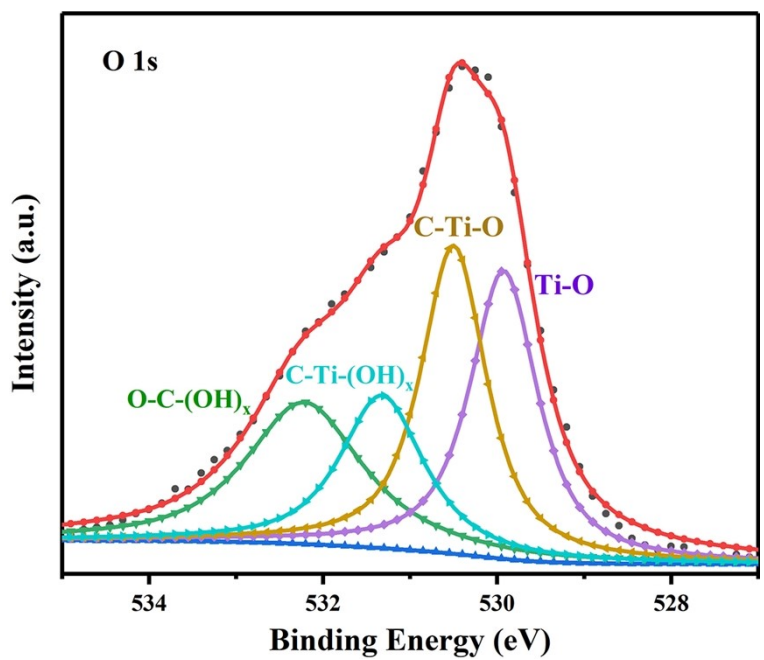

Fig. S2: XPS spectra of O 1s of M<sub>0.33</sub>Pt.

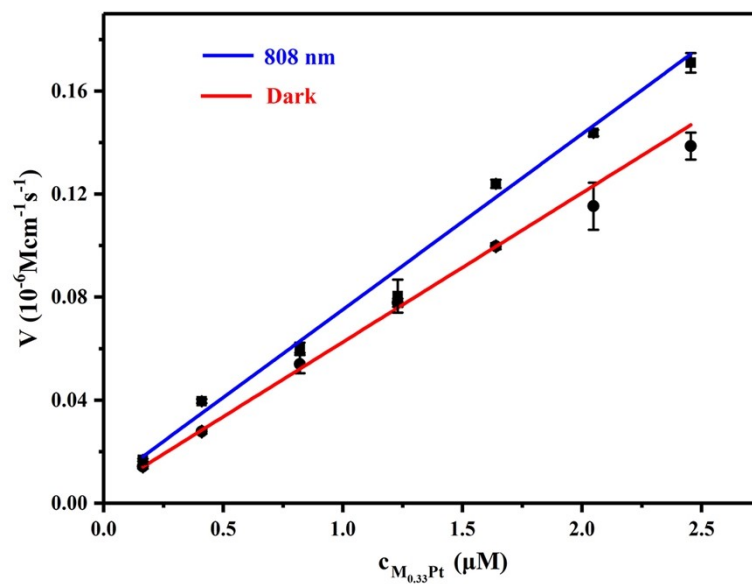

Fig. S3: The dependence of TMB oxidation rate on the concentration of  $M_{0.33}Pt$  under dark and light condition.

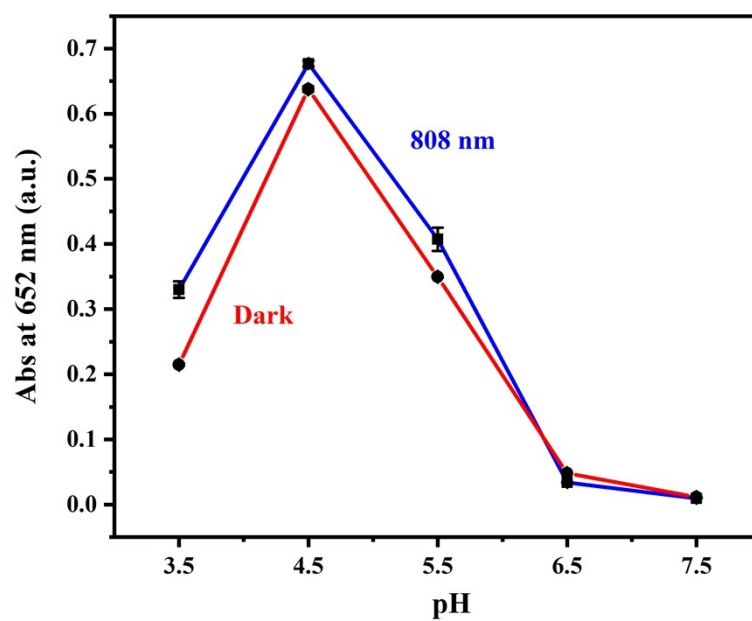

Fig. S4: POD activity of  $M_{0.33}Pt$  nanoparticles under different pH conditions

**Table S1**

Comparison of different biosensor for the detection of glucose.

| Catalyst                 | Linear Range [ $\mu\text{M}$ ] | LOD [ $\mu\text{M}$ ] | Reference |
|--------------------------|--------------------------------|-----------------------|-----------|
| Pt/EMT                   | 80-280                         | 13.2                  | 1         |
| Pt <sub>10</sub> -LP     | 2.5-1000                       | 1.89                  | 2         |
| BSA-Pt                   | 10-120                         | 2                     | 3         |
| Pt/cube-CeO <sub>2</sub> | 5-100                          | 4.1                   | 4         |
| Pt/Uio-66-66%            | 16.75-837.5                    | 5.58                  | 5         |
| Au@Pt                    | 45-400                         | 45                    | 6         |
| M <sub>0.33</sub> Pt     | 40-500                         | 0.85                  | This work |

**Table S2**

Comparison of different biosensor for the detection of GSH

| Catalyst                                           | Linear Range [ $\mu\text{M}$ ] | LOD [ $\mu\text{M}$ ] | Reference |
|----------------------------------------------------|--------------------------------|-----------------------|-----------|
| PtNPs@MnO <sub>2</sub>                             | 0.2-11                         | 0.05                  | 7         |
| Pt <sub>10</sub> -LP NCs                           | 4-140                          | 0.37                  | 2         |
| MoS <sub>2</sub> @CoFe <sub>2</sub> O <sub>4</sub> | 0.5-35                         | 0.21                  | 8         |
| h-Fe <sub>3</sub> O <sub>4</sub> @ppy              | 0.5-80                         | 0.15                  | 9         |
| PtNP/GO                                            | 0.02-20                        | 0.004                 | 10        |
| MXene@NiFe-LDH                                     | 0.9-30                         | 0.084                 | 11        |
| M <sub>0.33</sub> Pt                               | 0.4-7                          | 0.0089                | This work |

**References**

[1] X. Li, X. Yang, X. Cheng, Y. Zhao, W. Luo, A. Elzatahry, A. Alghamdi, X. He, J. Su and Y. Deng, *J. Colloid Interf. Sci.*, 2020, **570**, 300-311.

[2] L. Fan, X. Ji, G. Lin, K. Liu, S. Chen, G. Ma, W. Xue and L. Wang, *Microchem. J.*,

2021, **166**, 106202.

[3] S. He, R. Chen, Y. Wu, G. Wu, H. Peng, A. Liu, H. Deng, X. Xia and W. Chen, *Microchim. Acta*, 2019, **186**, 778.

[4] Z. Li, X. Yang, Y. Yang, Y. Tan, Y. He, M. Liu, X. Liu and Q. Yuan, *Chem. Eur. J.*, 2017, **24**, 409-514.

[5] H. Wang, J. Zhao, C. Liu, Y. Tong and W. He, *ACS Omega*, 2021, **6**, 4807-4815.

[6] J. Liu, X. Hu, S. Hou, T. Wen, W. Liu, X. Zhu, J. Yin and X. Wu, *Sensor. Actuat. B-Chem.*, 2012, **166-167**, 708-714.

[7] J. Liu, L. Meng, Z. Fei, P. Dyson and L. Zhang, *Biosens. Bioelectron.*, 2018, **121**, 159-165.

[8] Z. Xian, L. Zhang, Y. Yu, B. Lin, Y. Wang, M. Guo and Y. Cao, *Microchim. Acta*, 2021, **188**.

[9] W. Yang, C. Weng, X. Li, Y. X, H. He, J. Fei, W. Xu, X. Yang, W. Zhu, H. Zhang and X. Zhou, *Sensor. Actuat. B-Chem.*, 2021, **338**, 129844.

[10] H. Xu, H. Deng, X. Lin, Y. Wu, X. Lin, H. Peng, A. Liu, X. Xia and W. Chen, *Microchim. Acta*, 2017, **184**, 3945-3951.

[11] H. Li, Y. Wen, X. Zhu, J. Wang, L. Zhang and B. Sun, *ACS Sustain. Chem. Eng.*, 2020, **8**, 520-526.
